# Supplementary material for: Perphenazine–fumaric acid salts with improved solubility: preparation, physico-chemical characterization and in vitro dissolution
Source: Royal Society of Chemistry journal article supplement (doi:10.1039/c2ce25846c), 2012-01-01

## Electronic Supplementary Information (ESI)

### **Perphenazine-fumaric acid salts with improved solubility: preparation, physico-chemical characterization and in vitro dissolution.**

Giovanna Bruni, Mariarosa Maietta, Laretta Maggi, Marcella Bini, Doretta Capsoni, Stefania Ferrari, Massimo Boiocchi, Vittorio Berbenni, Chiara Milanese, Amedeo Marini

Fig. S1 – Comparison of XRPD patterns of pristine (red) and 6 months aged (blue) PFA2:1 salt.

Fig. S2 - Dissolution profiles in HCl 0.1N of capsules formulations containing perphenazine or the two salts (coarse samples) in comparison to the reference Trilafon® tablets (drug content is always 8 mg).

Fig. S3 - Comparison of the dissolution profiles in water of capsules formulations containing the two perphenazine salts coarse and milled samples (drug content is always 8 mg).

Fig. S1

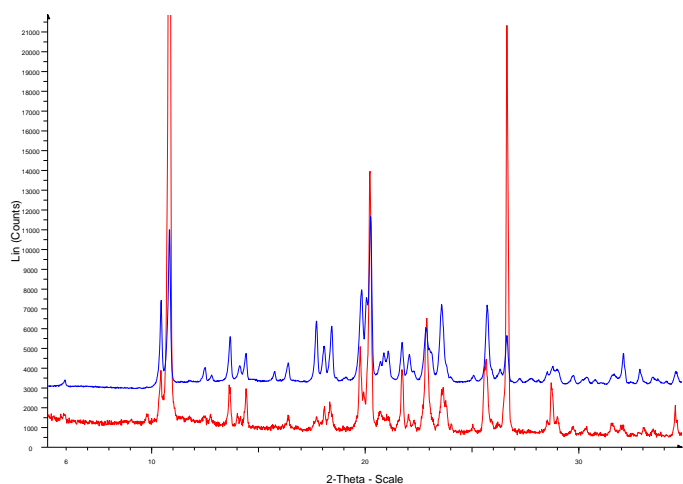

Fig. S2

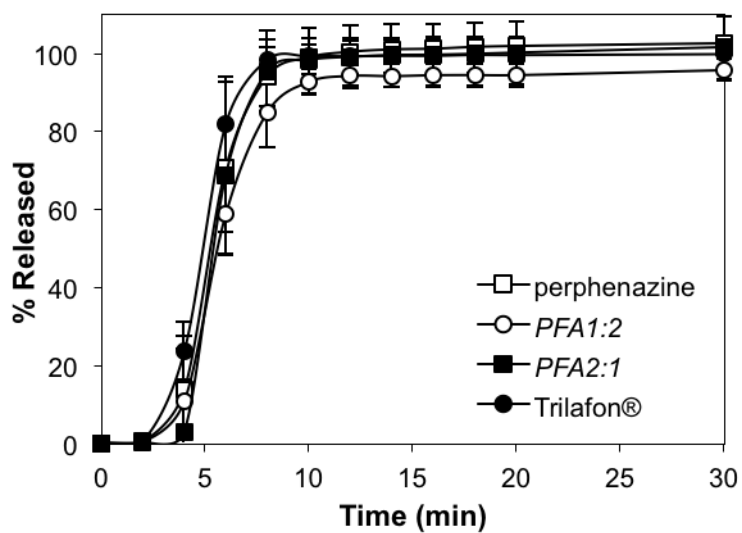

Fig. S3

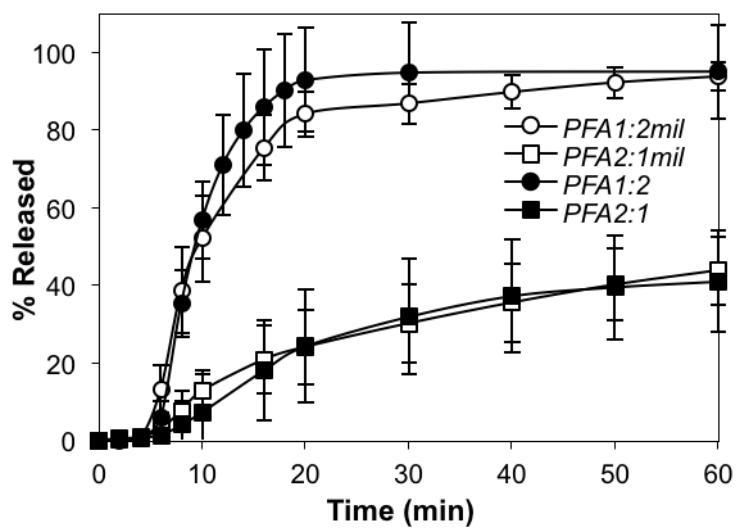

Supplement: c2ce25846c.pdf [file c2ce25846c.pdf]
